# Supplementary material for: Quadruple Quorum-Sensing Inputs Control Vibrio cholerae Virulence and Maintain System Robustness
Source: PubMed Central journal article supplement (PMC4398556; doi:10.1371/journal.ppat.1004837), 2015-04-15
Supplement: ppat.1004837.s001.pdf [file ppat.1004837.s001.pdf]

## SUPPORTING INFORMATION

**S1 Table. Bacterial strains used in this study.**

| Strain number              | Relevant genotype                                         | Antibiotic resistance(s) | Source     |
|----------------------------|-----------------------------------------------------------|--------------------------|------------|
| <i>V. cholerae</i> strains |                                                           |                          |            |
| WN001                      | WT <i>Vibrio cholerae</i> C6706 O1 El Tor                 | SmR                      | [1]        |
| WN003                      | $\Delta cqsS$ (BH1545)                                    | SmR                      | [2]        |
| WN004                      | $\Delta cqsS \Delta luxQ$ (BH1569)                        | SmR                      | [2]        |
| WN034                      | $\Delta luxQ$ pBB1 (BH1589)                               | TetR                     | [2]        |
| WN072                      | $\Delta luxO$ (SLS349)                                    | SmR                      | [3]        |
| WN744                      | $\Delta cqsA \Delta luxS$                                 | SmR                      | [4]        |
| WN778                      | $luxO^{D61E}$ (SLS340)                                    | SmR                      | [3]        |
| WN780                      | $\Delta qrr1-4$ (SLS456)                                  | SmR                      | [5]        |
| WN1171                     | $\Delta luxQ$                                             | SmR                      | [2]        |
| WN1554                     | $\Delta lacZ$                                             | SmR                      | [2]        |
| WN3012                     | $luxO^{D61A}$                                             | SmR                      | This study |
| WN3045                     | Original $\Delta luxU$ (BH1530)                           | SmR                      | [2]        |
| WN3046                     | Original $\Delta luxU$ pBB1 (BH1540)                      | TetR                     | [2]        |
| WN3053                     | WT pBK1003                                                | CmR                      | This study |
| WN3054                     | $\Delta cqsS \Delta luxQ$ pBK1003                         | CmR                      | This study |
| WN3055                     | $\Delta luxO$ pBK1003                                     | CmR                      | This study |
| WN3056                     | $luxO^{D61E}$ pBK1003                                     | CmR                      | This study |
| WN3059                     | $luxO^{D61A}$ pBK1003                                     | CmR                      | This study |
| WN3092                     | $\Delta cqsS \Delta luxQ csrA::Tn5$ pBK1003               | CmR                      | This study |
| WN3174                     | $\Delta vpsS$                                             | SmR                      | This study |
| WN3176                     | $\Delta cqsS \Delta luxQ \Delta vpsS$                     | SmR                      | This study |
| WN3189                     | $\Delta cqsS \Delta luxQ \Delta vpsS$ pBK1003             | CmR                      | This study |
| WN3201                     | WT pBB1                                                   | TetR                     | [2]        |
| WN3202                     | $\Delta cqsS \Delta luxQ$ pBB1                            | TetR                     | [2]        |
| WN3203                     | $luxO^{D61E}$ pBB1                                        | TetR                     | This study |
| WN3204                     | $\Delta vpsS$ pBB1                                        | TetR                     | This study |
| WN3205                     | $\Delta luxO$ pBB1                                        | TetR                     | [2]        |
| WN3208                     | $\Delta cqsS \Delta luxQ \Delta vpsS$ pBB1                | TetR                     | This study |
| WN3350                     | $\Delta cqsS \Delta luxQ \Delta cqsR$                     | SmR                      | This study |
| WN3354                     | $\Delta cqsS \Delta luxQ \Delta vpsS \Delta cqsR$         | SmR                      | This study |
| WN3356                     | $\Delta cqsR$                                             | SmR                      | This study |
| WN3357                     | $\Delta cqsS \Delta luxQ \Delta cqsR$ pBB1                | TetR                     | This study |
| WN3360                     | $\Delta cqsS \Delta luxQ \Delta vpsS \Delta cqsR$ pBB1    | TetR                     | This study |
| WN3366                     | $\Delta cqsR$ pBB1                                        | TetR                     | This study |
| WN3369                     | $\Delta vpsS \Delta cqsR$                                 | SmR                      | This study |
| WN3372                     | $\Delta vpsS \Delta cqsR$ pBB1                            | TetR                     | This study |
| WN3383                     | $\Delta cqsS \Delta luxQ \Delta cqsR$ pBK1003             | CmR                      | This study |
| WN3385                     | $\Delta cqsS \Delta luxQ \Delta vpsS \Delta cqsR$ pBK1003 | CmR                      | This study |
| WN3391                     | $\Delta vpsS \Delta cqsR$ pBK1003                         | CmR                      | This study |

|                        |                                                                             |           |            |
|------------------------|-----------------------------------------------------------------------------|-----------|------------|
| WN3557                 | New $\Delta luxU$                                                           | SmR       | This study |
| WN3569                 | New $\Delta luxU$ pBB1                                                      | TetR      | This study |
| WN3627                 | $\Delta cqsS \Delta vpsS \Delta cqsR$                                       | SmR       | This study |
| WN3628                 | $\Delta luxQ \Delta vpsS \Delta cqsR$                                       | SmR       | This study |
| WN3649                 | $\Delta cqsS \Delta vpsS \Delta cqsR$ pBB1                                  | TetR      | This study |
| WN3651                 | $\Delta luxQ \Delta vpsS \Delta cqsR$ pBB1                                  | TetR      | This study |
| WN3671                 | $\Delta cqsS \Delta luxQ \Delta vpsS \Delta cqsR luxO^{D61E}$               | SmR       | This study |
| WN3724                 | $\Delta cqsS \Delta luxQ \Delta vpsS \Delta cqsR luxO^{D61E}$ pBB1          | TetR      | This study |
| WN3842                 | $\Delta cqsS \Delta luxQ \Delta vpsS \Delta cqsR$ pEVS143 pBB1              | KanR TetR | This study |
| WN3843                 | $\Delta cqsS \Delta luxQ \Delta vpsS \Delta cqsR$ pEVS143- <i>cqsS</i> pBB1 | KanR TetR | This study |
| WN3844                 | $\Delta cqsS \Delta luxQ \Delta vpsS \Delta cqsR$ pEVS143- <i>cqsR</i> pBB1 | KanR TetR | This study |
| WN3847                 | $\Delta cqsS \Delta luxQ \Delta vpsS \Delta cqsR$ pEVS143- <i>luxQ</i> pBB1 | KanR TetR | This study |
| WN3848                 | $\Delta cqsS \Delta luxQ \Delta vpsS \Delta cqsR$ pEVS143- <i>vpsS</i> pBB1 | KanR TetR | This study |
| WN3862                 | New $\Delta luxU$ pEVS143- <i>luxO</i> <sup>G333S</sup> pBB1                | KanR TetR | This study |
| WN3872                 | New $\Delta luxU$ pEVS143- <i>luxO</i> pBB1                                 | KanR TetR | This study |
| WN3885                 | New $\Delta luxU$ pFED342 pBB1                                              | KanR TetR | This study |
| WN3938                 | $\Delta luxQ \Delta vpsS$                                                   | SmR       | This study |
| WN3940                 | $\Delta luxQ \Delta cqsR$                                                   | SmR       | This study |
| WN3941                 | $\Delta luxQ \Delta vpsS$ pBB1                                              | TetR      | This study |
| WN3945                 | $\Delta luxQ \Delta cqsR$ pBB1                                              | TetR      | This study |
| WN4053                 | Original $\Delta luxU$ pBK1003                                              | CmR       | This study |
| WN4056                 | $\Delta cqsS \Delta vpsS \Delta cqsR$ pBK1003                               | CmR       | This study |
| WN4060                 | $\Delta luxQ \Delta vpsS \Delta cqsR$ pBK1003                               | CmR       | This study |
| WN4061                 | New $\Delta luxU$ pBK1003                                                   | CmR       | This study |
| WN4074                 | $\Delta cqsS \Delta luxQ \Delta vpsS \Delta cqsR luxO^{D61E}$ pBK1003       | CmR       | This study |
| <i>E. coli</i> strains |                                                                             |           |            |
| BH032                  | S17- $\lambda$ <i>pir</i> pKAS32- <i>luxO</i> <sup>D61E</sup>               | AmpR      | [6]        |
| WN008                  | S17- $\lambda$ <i>pir</i> pKAS32- $\Delta cqsS$ (MM1428)                    | AmpR      | [2]        |
| WN009                  | S17- $\lambda$ <i>pir</i> pKAS32                                            | AmpR      | [7]        |
| WN048                  | S17- $\lambda$ <i>pir</i> pBB1                                              | TetR      | [2]        |
| WN092                  | S17- $\lambda$ <i>pir</i> pEVS143                                           | KanR      | [8]        |
| WN479                  | S17- $\lambda$ <i>pir</i> pFED342                                           | KanR      | [9]        |
| WN776                  | S17- $\lambda$ <i>pir</i> pKAS32- $\Delta luxO$ (MM1190)                    | AmpR      | [2]        |
| WN829                  | S17- $\lambda$ <i>pir</i> pEVS143- <i>cqsS</i>                              | KanR      | This study |
| WN1438                 | S17- $\lambda$ <i>pir</i> pKAS32- $\Delta lacZ$                             | AmpR      | [2]        |

|        |                                                                |      |            |
|--------|----------------------------------------------------------------|------|------------|
| WN2608 | S17-1 $\lambda$ pir pEVS143-luxO                               | KanR | [10]       |
| WN3013 | S17-1 $\lambda$ pir pKAS32-luxO <sup>D61A</sup>                | AmpR | This study |
| WN3043 | S17-1 $\lambda$ pir pBK1003 (P <sub>qrr4</sub> -lux)           | CmR  | [9]        |
| WN3167 | S17-1 $\lambda$ pir pKAS32- $\Delta$ vpsS                      | AmpR | This study |
| WN3342 | S17-1 $\lambda$ pir pKAS32- $\Delta$ cqsR                      | AmpR | This study |
| WN3426 | S17-1 $\lambda$ pir pKAS32- $\Delta$ luxQ (MM1134)             | AmpR | [2]        |
| WN3427 | S17-1 $\lambda$ pir pKAS32- $\Delta$ luxU (Original construct) | AmpR | [2]        |
| WN3540 | S17-1 $\lambda$ pir pKAS32- $\Delta$ luxU (New construct)      | AmpR | This study |
| WN3705 | S17-1 $\lambda$ pir pEVS143-cqsR                               | KanR | This study |
| WN3768 | S17-1 $\lambda$ pir pEVS143-luxQ                               | KanR | This study |
| WN3820 | S17-1 $\lambda$ pir pEVS143-vpsS                               | KanR | This study |
| WN3854 | S17-1 $\lambda$ pir pEVS143-luxO <sup>G333S</sup>              | KanR | This study |

## References

1. Thelin KH, Taylor RK (1996) Toxin-coregulated pilus, but not mannose-sensitive hemagglutinin, is required for colonization by *Vibrio cholerae* O1 El Tor biotype and O139 strains. *Infect Immun* 64: 2853-2856.
2. Miller MB, Skorupski K, Lenz DH, Taylor RK, Bassler BL (2002) Parallel quorum sensing systems converge to regulate virulence in *Vibrio cholerae*. *Cell* 110: 303-314.
3. Hammer BK, Bassler BL (2009) Distinct sensory pathways in *Vibrio cholerae* El Tor and classical biotypes modulate cyclic dimeric GMP levels to control biofilm formation. *J Bacteriol* 191: 169-177.
4. Hammer BK, Bassler BL (2007) Regulatory small RNAs circumvent the conventional quorum sensing pathway in pandemic *Vibrio cholerae*. *Proc Natl Acad Sci U S A* 104: 11145-11149.
5. Svenningsen SL, Tu KC, Bassler BL (2009) Gene dosage compensation calibrates four regulatory RNAs to control *Vibrio cholerae* quorum sensing. *EMBO J* 28: 429-439.
6. Hammer BK, Bassler BL (2003) Quorum sensing controls biofilm formation in *Vibrio cholerae*. *Mol Microbiol* 50: 101-104.
7. Skorupski K, Taylor RK (1996) Positive selection vectors for allelic exchange. *Gene* 169: 47-52.
8. Bose JL, Rosenberg CS, Stabb EV (2008) Effects of *luxCDABEG* induction in *Vibrio fischeri*: enhancement of symbiotic colonization and conditional attenuation of growth in culture. *Arch Microbiol* 190: 169-183.
9. Svenningsen SL, Waters CM, Bassler BL (2008) A negative feedback loop involving small RNAs accelerates *Vibrio cholerae*'s transition out of quorum-sensing mode. *Genes Dev* 22: 226-238.
10. Ng WL, Perez L, Cong J, Semmelhack MF, Bassler BL (2012) Broad spectrum pro-quorum-sensing molecules as inhibitors of virulence in vibrios. *PLoS Pathog* 8: e1002767.
