# Supplementary material for: Quadruple Quorum-Sensing Inputs Control Vibrio cholerae Virulence and Maintain System Robustness
Source: PubMed Central journal article supplement (PMC4398556; doi:10.1371/journal.ppat.1004837), 2015-04-15

### S1 Fig.

#### Effect of $luxO^{D61E}$ mutation on the QS response in a quadruple receptor *Vibrio cholerae* mutant.

The QS response in different *V. cholerae* mutants was measured with a HapR-dependent bioluminescence operon. Normalized light production was measured in triplicates. RLU denotes relative light units. Blue lines and symbols represent the  $luxO^{D61E}$  strain, black lines and symbols represent the  $\Delta cqsS \Delta luxQ \Delta vpsS \Delta cqsR$  strain, and red lines and symbols represent the  $\Delta cqsS \Delta luxQ \Delta vpsS \Delta cqsR luxO^{D61E}$  strain.

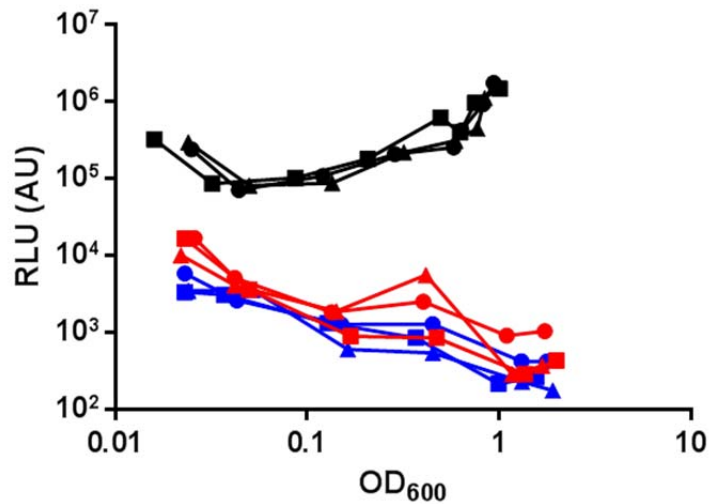

Supplement: ppat.1004837.s002.pdf [file ppat.1004837.s002.pdf]
