# Supplementary material for: Quadruple Quorum-Sensing Inputs Control Vibrio cholerae Virulence and Maintain System Robustness
Source: PubMed Central journal article supplement (PMC4398556; doi:10.1371/journal.ppat.1004837), 2015-04-15

#### S4 Fig.

#### Effect of *csrA* mutations on Qrr sRNA production in *V. cholerae*.

Qrr4 expression was measured with a *qrr4-lux* reporter in different *V. cholerae* mutants as indicated. Normalized light production was measured in triplicates. RLU denotes relative light units.

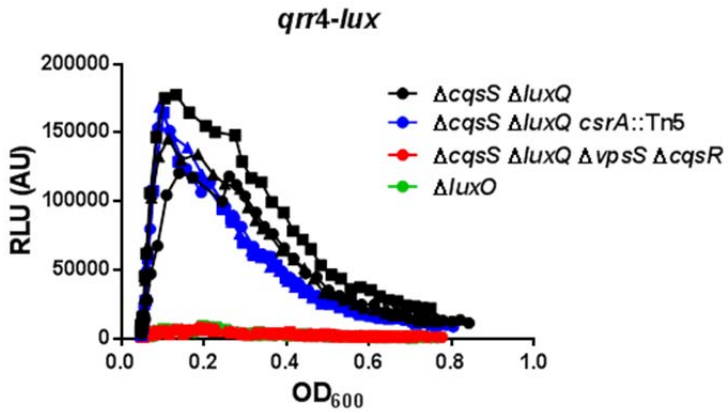

Supplement: ppat.1004837.s005.pdf [file ppat.1004837.s005.pdf]
