# Supplementary material for: Quadruple Quorum-Sensing Inputs Control Vibrio cholerae Virulence and Maintain System Robustness
Source: PubMed Central journal article supplement (PMC4398556; doi:10.1371/journal.ppat.1004837), 2015-04-15

### S5 Fig.

#### Induction of premature QS response in the triple receptor mutant expressing only CqsS by additional CAI-1.

The QS response of the triple receptor mutant ( $\Delta luxQ \Delta vpsS \Delta cqsR$ ) expressing CqsS only was measured with a HapR-dependent bioluminescence operon. Normalized light production was measured in duplicates at  $OD_{600} \sim 0.02$  with different concentrations of CAI-1 as shown. RLU denotes relative light units.

#### QS response of $\Delta 3$ ( $cqsS^+$ ) mutant in the presence of extra CAI-1 at $OD \sim 0.02$

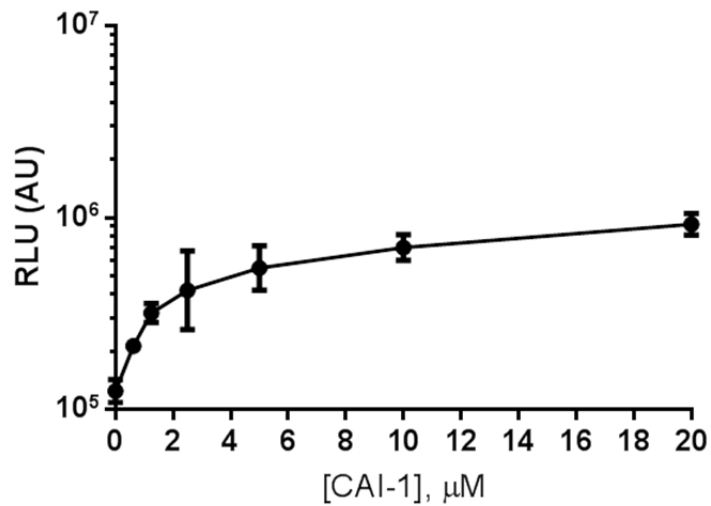

Supplement: ppat.1004837.s006.pdf [file ppat.1004837.s006.pdf]
