# Supplementary material for: Quadruple Quorum-Sensing Inputs Control Vibrio cholerae Virulence and Maintain System Robustness
Source: PubMed Central journal article supplement (PMC4398556; doi:10.1371/journal.ppat.1004837), 2015-04-15

### S6 Fig.

#### Growth of *V. cholerae* mutants in reconditioned spent culture medium.

Bacterial growth was measured by OD<sub>600</sub> every 30 minutes. Black curves indicate growth in fresh medium. Blue curves indicate growth in the presence of reconditioned spent medium harvested from the wild-type. Red curves indicate growth in the presence of reconditioned spent medium harvested from the  $\Delta cqsA \Delta luxS$  double synthase mutant.

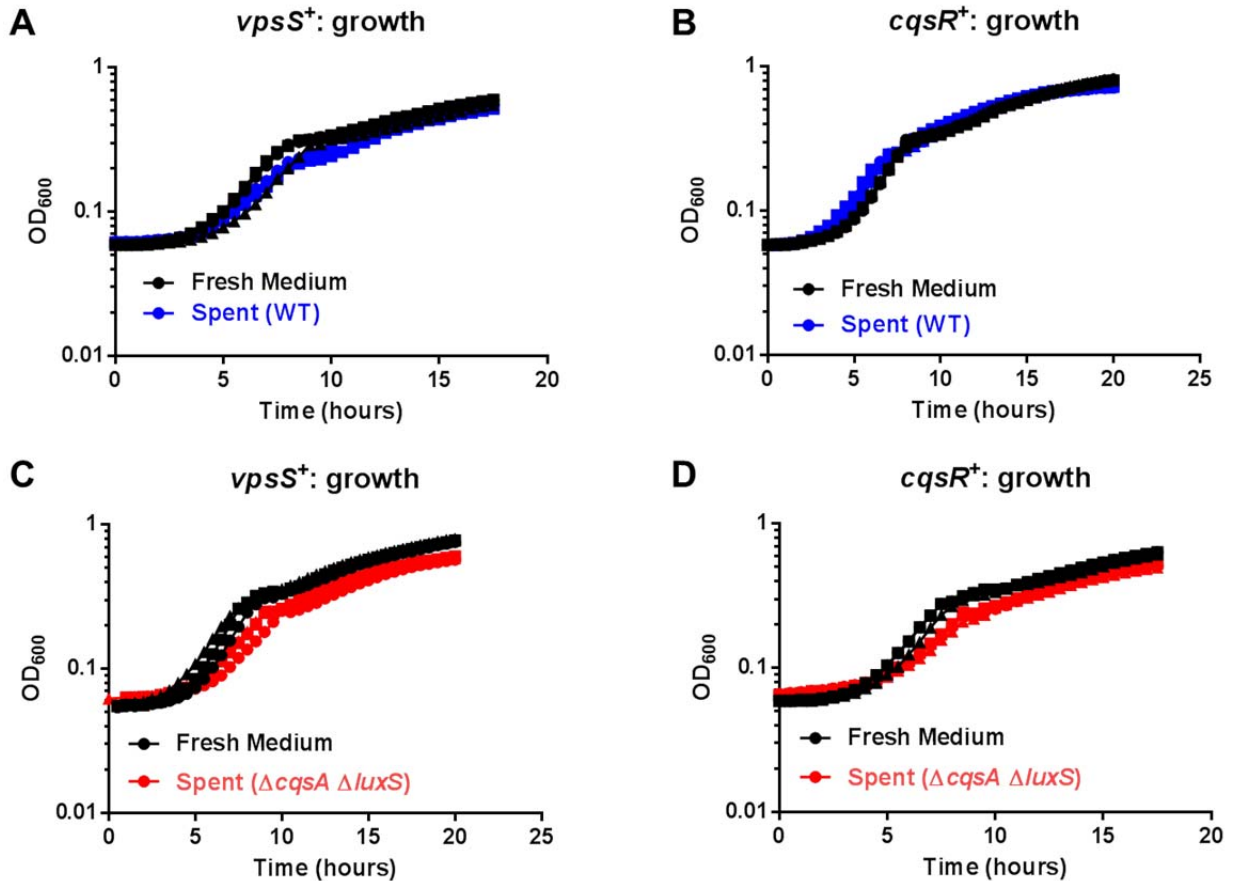

Supplement: ppat.1004837.s007.pdf [file ppat.1004837.s007.pdf]
