# Supplementary material for: Quadruple Quorum-Sensing Inputs Control Vibrio cholerae Virulence and Maintain System Robustness
Source: PubMed Central journal article supplement (PMC4398556; doi:10.1371/journal.ppat.1004837), 2015-04-15

**S7 Fig.**

**LCD reconditioned spent medium does not affect Qrr4 expression in triple receptor mutants expressing only VpsS or CqsR.**

Qrr4 expression in triple receptor mutants expressing only VpsS or CqsR was measured with a *qrr4-lux* reporter in the presence or absence of 80% (v/v) reconditioned spent medium harvested from wide-type *V. cholerae* grown to  $OD_{600} \sim 0.5$ . Normalized light production was measured in triplicates. 20% 5 $\times$  LB was added to supplement any loss of nutrients. RLU denotes relative light units.

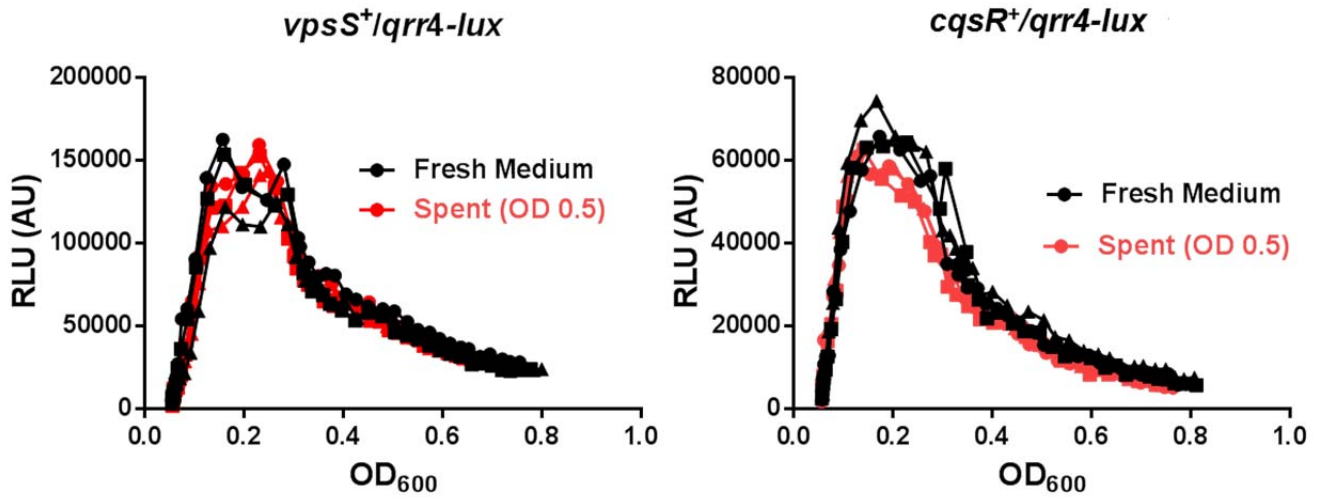

Supplement: ppat.1004837.s008.pdf [file ppat.1004837.s008.pdf]
