# Supplementary material for: Quadruple Quorum-Sensing Inputs Control Vibrio cholerae Virulence and Maintain System Robustness
Source: PLOS journal article supplement (doi:10.1371/journal.ppat.1004837), 2015-04-15

**S2 Fig.**

**LuxO activation is restored in the quadruple receptor mutant by overexpressing individual QS receptors.**

The QS response of the quadruple receptor mutants ( $\Delta cqsS \Delta luxQ \Delta vpsS \Delta cqsR$ ) expressing CqsS, LuxPQ, VpsS, or CqsR individually was measured with a HapR-dependent bioluminescence operon. Normalized light production was measured in duplicates. RLU denotes relative light units.

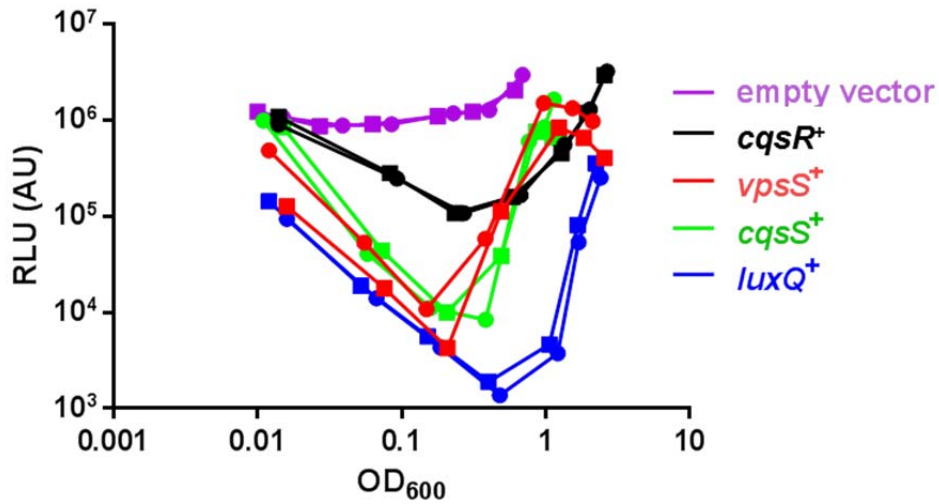

Supplement: S3 (10.1371/journal.ppat.1004837.s003) [file journal.ppat.1004837.s003]
